# Supplementary material for: Microbial profiles at baseline and not the use of antibiotics determine the clinical outcome of the treatment of chronic periodontitis
Source: PubMed Central journal article supplement (PMC4735321; doi:10.1038/srep20205), 2016-02-01
Supplement: srep20205-s1.pdf [file srep20205-s1.pdf]

**Microbial profiles at baseline and not the use of antibiotics  
determine the clinical outcome of treatment of chronic  
periodontitis**

**<sup>1</sup>S. Bizzarro\*, <sup>1</sup>M.L. Laine, <sup>2</sup>M.J. Buijs, <sup>2</sup>B.W. Brandt, <sup>2</sup>W. Crielaard, <sup>1</sup>B.G. Loos,  
<sup>2</sup>E. Zaura**

Supplementary Information

**Figure S1 | Average Shannon Diversity Index per treatment group and time-point.**

Error bar indicates standard deviation. No statistically significant difference between the time-points (BL – baseline, 3M – 3 months, 6M – 6 months, 12M – 12 months) ( $P>0.05$ , repeated-measures ANOVA) and the treatments was found ( $P>0.05$ , ANCOVA).

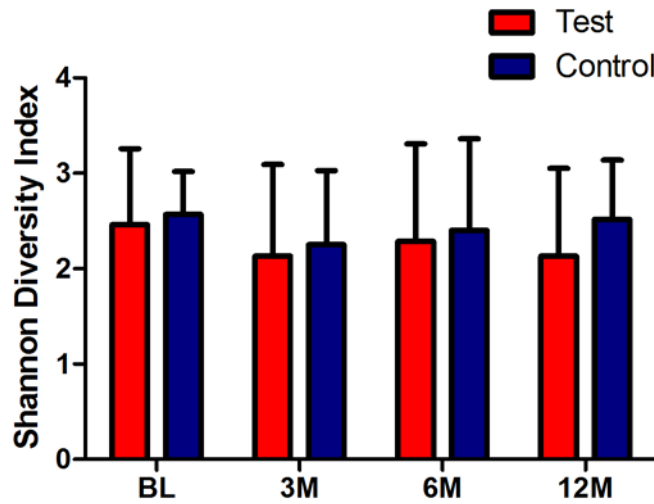

**Figure S2 | Significant correlation between bacterial OTUs at baseline and treatment outcome measured % of Clinical Attachment Level change (% CAL change). R and P values are from Spearman correlation.**

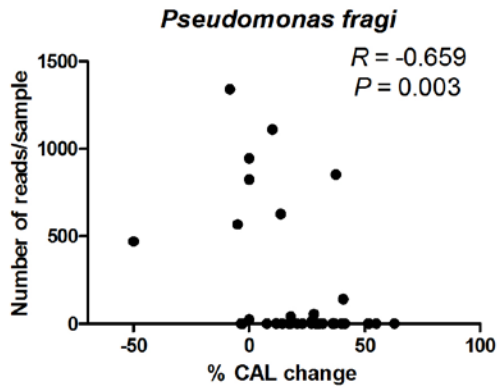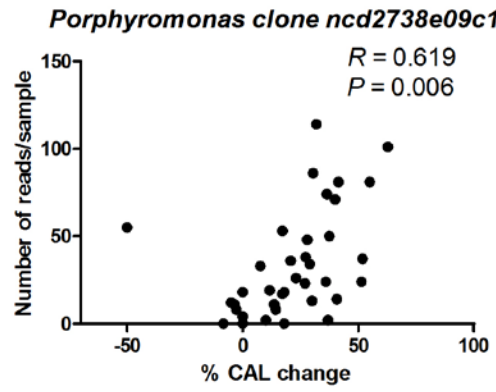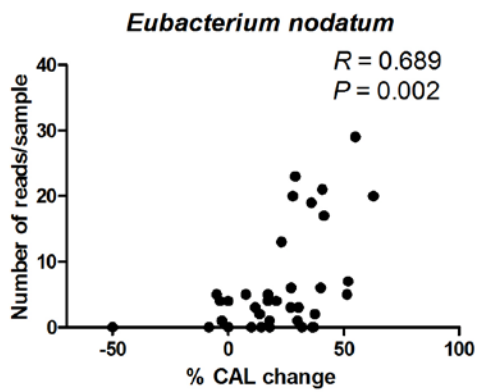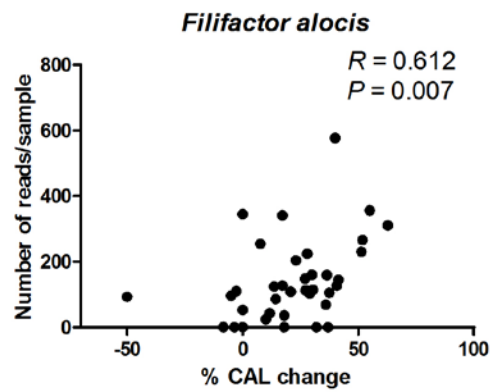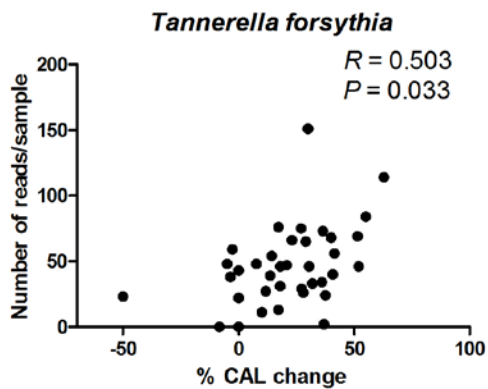

| <b>Table S1   Background characteristics of the study groups at baseline.</b>                                              |                 |             |                 |                |
|----------------------------------------------------------------------------------------------------------------------------|-----------------|-------------|-----------------|----------------|
|                                                                                                                            |                 | <b>Test</b> | <b>Controls</b> | <b>P value</b> |
| <i>N</i>                                                                                                                   |                 | 18          | 19              |                |
| Age (years)                                                                                                                |                 | 48.1 ± 9.8  | 49.7 ± 6.2      | NS             |
| Gender                                                                                                                     | male            | 9 (50%)     | 13 (68%)        | NS             |
| Ethnicity                                                                                                                  | Dutch Caucasian | 15 (84%)    | 16 (83%)        | NS             |
| Education                                                                                                                  | < high school   | 3 (17%)     | 2 (10%)         | NS             |
|                                                                                                                            | = high school   | 2 (11%)     | 3 (16%)         |                |
|                                                                                                                            | > high school   | 13 (72%)    | 14 (74%)        |                |
| Smoking                                                                                                                    | current         | 13 (68%)    | 8 (44%)         | NS             |
|                                                                                                                            | non smoker      | 6 (32%)     | 10 (56%)        |                |
| Values are means ± standard deviation or number of subjects (%). Independent T-test or $\chi^2$ <i>P</i> values indicated. |                 |             |                 |                |

**Table S2 | Full-mouth clinical results after therapy.**

|              |           | Test                     | Controls                 | <i>P</i> <sub>adj</sub> value* |
|--------------|-----------|--------------------------|--------------------------|--------------------------------|
| <i>N</i>     |           | 18                       | 19                       |                                |
| PPD (mm)     | Baseline  | 3.7 ± 0.6                | 3.9 ± 0.6                | 0.305                          |
|              | 3 months  | 2.7 ± 0.5 <sup>§</sup>   | 3.0 ± 0.5 <sup>§</sup>   | 0.142                          |
|              | 6 months  | 2.6 ± 0.5 <sup>§</sup>   | 3.0 ± 0.5 <sup>§</sup>   | 0.086                          |
|              | 12 months | 2.7 ± 0.5 <sup>§</sup>   | 3.0 ± 0.5 <sup>§</sup>   | 0.199                          |
| n° PPD ≥5 mm | Baseline  | 50.5 ± 22.1              | 51.8 ± 22.9              | 0.850                          |
|              | 3 months  | 12.6 ± 10.2 <sup>§</sup> | 20.7 ± 16.9 <sup>§</sup> | 0.071                          |
|              | 6 months  | 11.6 ± 8.9 <sup>§</sup>  | 20.8 ± 17.3 <sup>§</sup> | 0.037                          |
|              | 12 months | 11.9 ± 10.4 <sup>§</sup> | 22.5 ± 20.7 <sup>§</sup> | 0.057                          |
| n° PPD ≥6 mm | Baseline  | 28.0 ± 17.4              | 34.9 ± 20.7              | 0.282                          |
|              | 3 months  | 3.6 ± 3.9 <sup>§</sup>   | 10.5 ± 11.7 <sup>§</sup> | 0.047                          |
|              | 6 months  | 3.7 ± 3.9 <sup>§</sup>   | 11.1 ± 12.9 <sup>§</sup> | 0.054                          |
|              | 12 months | 4.1 ± 4.7 <sup>§</sup>   | 11.7 ± 13.5 <sup>§</sup> | 0.057                          |
| n° PPD ≥7 mm | Baseline  | 18.0 ± 13.2              | 20.0 ± 15.9              | 0.679                          |
|              | 3 months  | 0.8 ± 1.5 <sup>§</sup>   | 4.7 ± 6.2 <sup>§</sup>   | 0.013                          |
|              | 6 months  | 1.2 ± 2.1 <sup>§</sup>   | 5.3 ± 6.4 <sup>§</sup>   | 0.013                          |
|              | 12 months | 0.7 ± 1.1 <sup>§</sup>   | 5.4 ± 7.6 <sup>§</sup>   | 0.016                          |
| CAL (mm)     | Baseline  | 4.0 ± 1.1                | 4.4 ± 0.8                | 0.186                          |
|              | 3 months  | 3.3 ± 1.2 <sup>§</sup>   | 3.9 ± 0.8 <sup>§</sup>   | 0.297                          |
|              | 6 months  | 3.3 ± 1.1 <sup>§</sup>   | 3.9 ± 0.8 <sup>§</sup>   | 0.300                          |
|              | 12 months | 3.3 ± 1.2 <sup>§</sup>   | 3.9 ± 0.8 <sup>§</sup>   | 0.438                          |
| BOP (%)      | Baseline  | 69.5 ± 16.3              | 64.9 ± 13.3              | 0.349                          |
|              | 3 months  | 20.7 ± 11.9 <sup>§</sup> | 20.1 ± 11.8 <sup>§</sup> | 0.945                          |
|              | 6 months  | 20.0 ± 14.8 <sup>§</sup> | 22.5 ± 14.9 <sup>§</sup> | 0.512                          |
|              | 12 months | 21.5 ± 14.7 <sup>§</sup> | 22.0 ± 12.8 <sup>§</sup> | 0.825                          |
| Plaque (%)   | Baseline  | 69.1 ± 25.1              | 56.6 ± 27.7              | 0.159                          |
|              | 3 months  | 17.3 ± 14.9 <sup>§</sup> | 17.6 ± 18.3 <sup>§</sup> | 0.348                          |
|              | 6 months  | 17.0 ± 18.5 <sup>§</sup> | 22.0 ± 21.3 <sup>§</sup> | 0.169                          |
|              | 12 months | 19.4 ± 15.1 <sup>§</sup> | 19.5 ± 15.3 <sup>§</sup> | 0.679                          |

PPD, probing pocket depth; CAL, clinical attachment level; BOP, bleeding on probing. Values are means ± standard deviations. \*Difference between Test and Control (ANCOVA, adjusted for the corresponding variable at baseline). <sup>§</sup>*P* < 0.05 in comparison with baseline (repeated-measures ANOVA)

**Table S3 | Classification of reads at genus level or higher taxon.**

| <b>Genus</b>                      | <b>Test</b>   | <b>Control</b> |
|-----------------------------------|---------------|----------------|
| <i>Fusobacterium</i>              | 24.00 ± 18.11 | 22.11 ± 13.77  |
| <i>Uncl. Pseudomonodaceae</i>     | 13.24 ± 30.46 | 13.86 ± 23.01  |
| <i>Filifactor</i>                 | 8.88 ± 8.03   | 11.33 ± 9.96   |
| <i>Treponema</i>                  | 5.67 ± 7.18   | 6.60 ± 6.49    |
| <i>Paludibacter</i>               | 4.98 ± 5.66   | 7.18 ± 8.55    |
| <i>Porphyromonas</i>              | 4.40 ± 5.60   | 4.45 ± 3.94    |
| <i>Tannerella</i>                 | 3.01 ± 1.87   | 3.69 ± 3.69    |
| <i>Clostridiales Fam.xiii IS</i>  | 3.10 ± 2.27   | 2.86 ± 2.17    |
| <i>Prevotella</i>                 | 3.52 ± 4.38   | 4.28 ± 4.21    |
| <i>Acinetobacter</i>              | 2.73 ± 7.54   | 0.12 ± 0.25    |
| <i>Parvimonas</i>                 | 2.86 ± 2.33   | 2.57 ± 2.71    |
| <i>Synergistaceae</i>             | 2.17 ± 1.51   | 2.79 ± 1.70    |
| <i>Actinomyces</i>                | 1.63 ± 2.12   | 1.41 ± 1.28    |
| <i>Streptococcus</i>              | 0.68 ± 0.66   | 0.76 ± 1.34    |
| <i>Neisseria</i>                  | 0.96 ± 1.05   | 1.11 ± 2.91    |
| <i>Campylobacter</i>              | 0.73 ± 0.54   | 1.17 ± 1.21    |
| <i>Rothia</i>                     | 0.65 ± 1.02   | 0.59 ± 1.16    |
| <i>Capnocytophaga</i>             | 0.60 ± 0.95   | 0.13 ± 0.19    |
| <i>Veillonella</i>                | 0.38 ± 0.49   | 0.80 ± 1.35    |
| <i>Haemophilus</i>                | 0.24 ± 0.37   | 0.38 ± 1.06    |
| <i>Micrococcales</i>              | 0.07 ± 0.17   | 0.12 ± 0.46    |
| <i>Gemella</i>                    | 0.40 ± 0.61   | 0.26 ± 0.32    |
| <i>Corynebacterium</i>            | 0.35 ± 0.48   | 0.23 ± 0.49    |
| <i>Selenomonas</i>                | 0.69 ± 0.70   | 0.84 ± 0.98    |
| <i>Peptostreptococcus Fam. IS</i> | 0.33 ± 0.31   | 0.72 ± 1.11    |
| <i>Wchb1-69</i>                   | 0.52 ± 0.71   | 1.04 ± 2.09    |
| <i>Leptotrichia</i>               | 0.35 ± 0.48   | 0.13 ± 0.22    |
| <i>Johnsonella</i>                | 0.48 ± 0.55   | 0.82 ± 1.11    |
| <i>Derxia</i>                     | 0.10 ± 0.14   | 0.08 ± 0.35    |
| <i>Aggregatibacter</i>            | 0.85 ± 2.40   | 0.03 ± 0.09    |

Reads account for 90% of all OTUs at baseline for Test and Control. Values indicate relative abundance (mean ± standard deviation).

**Table S4 | Full mouth clinical parameters at baseline and after treatment according to the response to therapy.**

|            |           | <b>BMR</b>               | <b>AMR</b>               | <b><i>P</i><sub>adj</sub> value*</b> |
|------------|-----------|--------------------------|--------------------------|--------------------------------------|
| <i>N</i>   |           | 19                       | 18                       |                                      |
| CAL (mm)   | Baseline  | 4.4 ± 1.0                | 3.9 ± 0.9                | 0.139                                |
|            | 3 months  | 4.0 ± 1.1 <sup>§</sup>   | 3.1 ± 0.8 <sup>§</sup>   | 0.003                                |
|            | 6 months  | 4.0 ± 1.1 <sup>§</sup>   | 3.1 ± 0.9 <sup>§</sup>   | 0.002                                |
|            | 12 months | 4.1 ± 1.1                | 3.0 ± 0.8 <sup>§</sup>   | <0.001                               |
| PPD (mm)   | Baseline  | 3.9 ± 0.6                | 3.8 ± 0.6                | 0.785                                |
|            | 3 months  | 3.1 ± 0.6 <sup>§</sup>   | 2.6 ± 0.3 <sup>§</sup>   | 0.001                                |
|            | 6 months  | 3.1 ± 0.6 <sup>§</sup>   | 2.6 ± 0.3 <sup>§</sup>   | <0.001                               |
|            | 12 months | 3.1 ± 0.6 <sup>§</sup>   | 2.5 ± 0.3 <sup>§</sup>   | <0.001                               |
| BOP (%)    | Baseline  | 66.7 ± 16.8              | 67.6 ± 12.8              | 0.869                                |
|            | 3 months  | 23.2 ± 12.5 <sup>§</sup> | 17.4 ± 10.3 <sup>§</sup> | 0.115                                |
|            | 6 months  | 26.7 ± 17.2 <sup>§</sup> | 15.5 ± 8.7 <sup>§</sup>  | 0.017                                |
|            | 12 months | 25.2 ± 16.9 <sup>§</sup> | 21.3 ± 14.7 <sup>§</sup> | 0.143                                |
| Plaque (%) | Baseline  | 62.1 ± 23.4              | 63.2 ± 30.8              | 0.899                                |
|            | 3 months  | 15.7 ± 15.4 <sup>§</sup> | 19.2 ± 17.8 <sup>§</sup> | 0.511                                |
|            | 6 months  | 23.9 ± 23.1 <sup>§</sup> | 15.0 ± 15.2 <sup>§</sup> | 0.137                                |
|            | 12 months | 22.5 ± 16.2 <sup>§</sup> | 16.2 ± 13.5 <sup>§</sup> | 0.187                                |

BMR, below median responders; AMR, above median responders. Values are means ± standard deviations.

\*Difference between groups (ANCOVA). *P* values are adjusted for the corresponding baseline variable. <sup>§</sup>*P* <0.05 in comparison with baseline (repeated-measures ANOVA).

| <b>Table S5   Association between presence of taxa with treatment outcome per treatment group at the different time visits.</b>                 |             |                                          |                                                                                                                                                               |                                                             |
|-------------------------------------------------------------------------------------------------------------------------------------------------|-------------|------------------------------------------|---------------------------------------------------------------------------------------------------------------------------------------------------------------|-------------------------------------------------------------|
|                                                                                                                                                 | <b>Test</b> |                                          | <b>Control</b>                                                                                                                                                |                                                             |
| <b>time visit</b>                                                                                                                               | <b>BMR</b>  | <b>AMR</b>                               | <b>BMR</b>                                                                                                                                                    | <b>AMR</b>                                                  |
| Baseline                                                                                                                                        |             | <i>Porphyromonas</i>                     | -                                                                                                                                                             | -                                                           |
| 3 months                                                                                                                                        |             | <i>Actinomyces</i><br><i>Haemophilus</i> |                                                                                                                                                               | <i>Haemophilus</i><br><i>Rothia</i><br><i>Streptococcus</i> |
| 6 months                                                                                                                                        |             |                                          | <i>Paludibacter</i><br><i>Tannerella</i><br><i>Clostridiales fam</i><br><i>xiii is</i><br><i>Treponema</i><br><i>Unc. Synergistaceae</i><br><i>Filifactor</i> |                                                             |
| 12 months                                                                                                                                       |             | <i>Capnocytophaga</i>                    | <i>Paludibacter</i><br><i>Tannerella</i><br><i>Unc. Synergistaceae</i>                                                                                        | <i>Rothia</i>                                               |
| BMR= below median responders. AMR= above median responders. Taxa, which show significant higher abundance between BMR and AMR, are represented. |             |                                          |                                                                                                                                                               |                                                             |



| <b>Table S6   Inclusion/exclusion criteria</b> |                                                                                                                                                                                                                                                                  |
|------------------------------------------------|------------------------------------------------------------------------------------------------------------------------------------------------------------------------------------------------------------------------------------------------------------------|
| Inclusion                                      | <p>2 teeth per quadrant with pocket <math>\geq 5</math> mm with clinical evidence of attachment loss</p> <p>&gt;50% bleeding on probing</p> <p><math>\geq 20</math> teeth present</p>                                                                            |
| Exclusion                                      | <p>Any systemic disease</p> <p>Chronic use of medications</p> <p>Use of systemic antibiotics in the last 6 months</p> <p>Previous periodontal treatment in the last 2 years</p> <p>Pregnancy/lactation</p> <p>Presence of implants or orthodontic appliances</p> |

| <b>Table S7   Dataset of relative abundances of reads used for microbial co-occurrence or mutual exclusion.</b> |                 |                 |                 |                 |
|-----------------------------------------------------------------------------------------------------------------|-----------------|-----------------|-----------------|-----------------|
| <b>Genus or higher taxon</b>                                                                                    | <b>BMR</b>      |                 | <b>AMR</b>      |                 |
|                                                                                                                 | <b>Test</b>     | <b>Control</b>  | <b>Test</b>     | <b>Control</b>  |
| <i>Fusobacterium</i>                                                                                            | 0.2534 ± 0.2091 | 0.2357 ± 0.1387 | 0.2265 ± 0.1599 | 0.2049 ± 0.1430 |
| <i>Pseudomonadaceae</i>                                                                                         | 0.2633 ± 0.3983 | 0.1882 ± 0.2541 | 0.0017 ± 0.0042 | 0.0834 ± 0.2000 |
| <i>Prevotella</i>                                                                                               | 0.0252 ± 0.0327 | 0.0378 ± 0.0358 | 0.0451 ± 0.0528 | 0.0484 ± 0.0499 |
| <i>Paludibacter</i>                                                                                             | 0.0715 ± 0,0728 | 0.0911± 0,1081  | 0.0280 ± 0,0213 | 0.0502 ± 0.0484 |
| <i>Acinetobacter</i>                                                                                            | 0.0247 ± 0.0719 | 0.0016 ± 0.0032 | 0.0299 ± 0.0831 | 0.0008 ± 0.0013 |
| <i>Neisseria</i>                                                                                                | 0.0121 ± 0.0128 | 0.0052 ± 0.0060 | 0.0071 ± 0.0076 | 0.0176 ± 0.0422 |
| <i>Filifactor</i>                                                                                               | 0.0669 ± 0.0805 | 0.0859 ± 0.0765 | 0.1108 ± 0.0783 | 0.1437 ± 0.1172 |
| <i>Actinomyces</i>                                                                                              | 0.0219 ± 0.0286 | 0.0143 ± 0.0132 | 0.0106 ± 0.0082 | 0.0139 ± 0.0132 |
| <i>Rothia</i>                                                                                                   | 0.0097 ± 0.0123 | 0.0061 ± 0.0132 | 0.0033 ± 0.0072 | 0.0057 ± 0.0104 |
| <i>Treponema</i>                                                                                                | 0.0296 ± 0.0322 | 0.0454 ± 0.0490 | 0.0838 ± 0.0910 | 0.0889 ± 0.0754 |
| <i>Parvimonas</i>                                                                                               | 0.0286 ± 0.0226 | 0.0300 ± 0.0295 | 0.0287 ± 0.0254 | 0.0209 ± 0.0249 |
| <i>Porphyromonas</i>                                                                                            | 0.0142 ± 0.0139 | 0.0402 ± 0.0502 | 0.0737 ± 0.0670 | 0.0493 ± 0.0248 |
| <i>Streptococcus</i>                                                                                            | 0.0071 ± 0.0068 | 0.0086 ± 0.0146 | 0.0065 ± 0.0069 | 0.0063 ± 0.0128 |
| <i>Veillonella</i>                                                                                              | 0.0036 ± 0.0055 | 0.0110 ± 0.0169 | 0.0040 ± 0.0046 | 0.0048 ± 0.0080 |
| <i>Clostridiales Fam xiii IS</i>                                                                                | 0.0273 ± 0.0233 | 0.0284 ± 0.0188 | 0.0517 ± 0.0267 | 0.0441 ± 0.0307 |
| <i>Tannerella</i>                                                                                               | 0.0260 ± 0.0201 | 0.0269 ± 0.0113 | 0.0342 ± 0.0174 | 0.0481 ± 0.0308 |
| <i>Capnocytophaga</i>                                                                                           | 0.0066 ± 0.0118 | 0.0016 ± 0.0023 | 0.053 ± 0.0072  | 0.0010 ± 0.0015 |
| <i>Unc Synergistaceae</i>                                                                                       | 0.0194 ± 0.0152 | 0.0245 ± 0.0201 | 0.0240 ± 0.0155 | 0.0316 ± 0.0131 |

|                                    |                 |                 |                 |                 |
|------------------------------------|-----------------|-----------------|-----------------|-----------------|
| <i>Haemophilus</i>                 | 0.0016 ± 0.0030 | 0.0025 ± 0.0062 | 0.0032 ± 0.0043 | 0.0052 ± 0.0144 |
| <i>Campylobacter</i>               | 0.0058 ± 0.0049 | 0.0125 ± 0.0147 | 0.0089 ± 0.0056 | 0.0108 ± 0.0094 |
| <i>Micrococcales</i>               | 0.0008 ± 0.0019 | 0.0003 ± 0.0006 | 0.0006 ± 0.0017 | 0.0023 ± 0.0066 |
| <i>Gemella</i>                     | 0.0032 ± 0.0072 | 0.0033 ± 0.0037 | 0.0049 ± 0.0054 | 0.0017 ± 0.0025 |
| <i>Corynebacterium</i>             | 0.0037 ± 0.0064 | 0.0030 ± 0.0064 | 0.0034 ± 0.0029 | 0.0016 ± 0.0026 |
| <i>Selenomonas</i>                 | 0.0048 ± 0.0054 | 0.0086 ± 0.0108 | 0.0092 ± 0.0082 | 0.0083 ± 0.0092 |
| <i>Peptostreptococcaceae IS</i>    | 0.0036 ± 0.0035 | 0.0071 ± 0.0140 | 0.0031 ± 0.0029 | 0.0075 ± 0.0094 |
| <i>Sphingobacteriales Wchb1-69</i> | 0.0028 ± 0.0059 | 0.0028 ± 0.0036 | 0.0076 ± 0.0077 | 0.0190 ± 0.0286 |
| <i>Johnsonella</i>                 | 0.0037 ± 0.0056 | 0.0065 ± 0.0119 | 0.0059 ± 0.0055 | 0.0102 ± 0.0105 |
| <i>Leptotrichia</i>                | 0.0022 ± 0.0036 | 0.0016 ± 0.0026 | 0.0048 ± 0.0056 | 0.0011 ± 0.0018 |
| <i>Derxia</i>                      | 0.0012 ± 0.0017 | 0.0001 ± 0.0002 | 0.0010 ± 0.0013 | 0.0017 ± 0.0052 |
| <i>Aggregatibacter</i>             | 0.0062 ± 0.0165 | 0.0001 ± 0.0003 | 0.0108 ± 0.0300 | 0.0006 ± 0.0013 |
| <i>Dialister</i>                   | 0.0017 ± 0.0023 | 0.0062 ± 0.0116 | 0.0030 ± 0.0033 | 0.0013 ± 0.0015 |
| <i>Pasteurellaceae</i>             | 0.0021 ± 0.0035 | 0.0014 ± 0.0022 | 0.0045 ± 0.0072 | 0.0036 ± 0.0039 |
| <i>Burkholderia</i>                | 0.0015 ± 0.0045 | 0.0036 ± 0.0113 | 0.0486 ± 0.1204 | 0.0007 ± 0.0021 |
| <i>Candidate division tm7</i>      | 0.0038 ± 0.0052 | 0.0055 ± 0.0072 | 0.0036 ± 0.0041 | 0.0034 ± 0.0050 |
| <i>Veillonellaceae</i>             | 0.0024 ± 0.0035 | 0.0030 ± 0.0057 | 0.0052 ± 0.0067 | 0.0028 ± 0.0029 |
| <i>Anaeroglobus</i>                | 0.0021 ± 0.0038 | 0.0025 ± 0.0041 | 0.0010 ± 0.0024 | 0.0015 ± 0.0026 |
| <i>Bacteria</i>                    | 0.0019 ± 0.0033 | 0.0025 ± 0.0031 | 0.0054 ± 0.0100 | 0.0047 ± 0.0027 |
| <i>Mycoplasma</i>                  | 0.0017 ± 0.0029 | 0.0034 ± 0.0075 | 0.0024 ± 0.0032 | 0.0034 ± 0.0048 |
| <i>Desulfobulbus</i>               | 0.0055 ± 0.0060 | 0.0037 ± 0.0026 | 0.0057 ± 0.0048 | 0.0053 ± 0.0026 |
| <i>Firmicutes</i>                  | 0.0050 ± 0.0058 | 0.0031 ± 0.0038 | 0.0057 ± 0.0063 | 0.0046 ± 0.0036 |

|                                    |                 |                 |                 |                 |
|------------------------------------|-----------------|-----------------|-----------------|-----------------|
| <i>Bulleidia</i>                   | 0.0013 ± 0.0015 | 0.0044 ± 0.0064 | 0.0005 ± 0.0010 | 0.0028 ± 0.0039 |
| <i>Leptotrichiaceae</i>            | 0.0003 ± 0.0006 | 0.0020 ± 0.0058 | 0.0047 ± 0.0093 | 0.0011 ± 0.0033 |
| <i>Propionibacteriaceae</i>        | 0.0006 ± 0.0012 | 0               | 0.0005 ± 0.0009 | 0.0002 ± 0.0007 |
| <i>Brevundimonas</i>               | 0.0006 ± 0.0017 | 0.0003 ± 0.0009 | 0.0010 ± 0.0029 | 0               |
| <i>Mogibacterium</i>               | 0.0040 ± 0.0079 | 0.0031 ± 0.0030 | 0.0029 ± 0.0029 | 0.0028 ± 0.0026 |
| <i>Prevotellaceae</i>              | 0.0006 ± 0.0008 | 0.0009 ± 0.0011 | 0.0013 ± 0.0016 | 0.0038 ± 0.0055 |
| <i>Peptococcus</i>                 | 0.0006 ± 0.0006 | 0.0004 ± 0.0008 | 0.0037 ± 0.0045 | 0.0011 ± 0.0013 |
| <i>Rikenellaceae Rc9 gut group</i> | 0.0010 ± 0.0016 | 0.0016 ± 0.0018 | 0.0011 ± 0.0019 | 0.0052 ± 0.056  |
| <i>Catonella</i>                   | 0.0005 ± 0.0012 | 0.0016 ± 0.0029 | 0.0025 ± 0.0024 | 0.0026 ± 0.0052 |
| <i>Actinobaculum</i>               | 0.0006 ± 0.0017 | 0               | 0.0021 ± 0.0028 | 0.0004 ± 0.0005 |
| <i>Cardiobacterium</i>             | 0.0006 ± 0.0008 | 0.0002 ± 0.0003 | 0.0013 ± 0.0023 | 0.0003 ± 0.010  |
| <i>Abiotrophia</i>                 | 0.0001 ± 0.0002 | 0               | 0.0002 ± 0.0005 | 0               |
| <i>Micrococcus</i>                 | 0.0002 ± 0.0007 | 0               | 0.0007 ± 0.0014 | 0               |
| <i>Oribacterium</i>                | 0.0011 ± 0.0023 | 0.0021 ± 0.0031 | 0.0003 ± 0.0007 | 0.0020 ± 0.0054 |
| <i>Xylanibacter</i>                | 0.0001 ± 0.0002 | 0.0009 ± 0.0018 | 0.0090 ± 0.0215 | 0.0018 ± 0.0028 |
| <i>Bergeyella</i>                  | 0.0002 ± 0.0005 | 0.0001 ± 0.0002 | 0.0007 ± 0.0019 | 0.0006 ± 0.0011 |
| <i>Desulfohalobiaceae</i>          | 0               | 0.0003 ± 0.0009 | 0.0130 ± 0.0390 | 0               |
| <i>Peptostreptococcus</i>          | 0.0005 ± 0.0012 | 0.0010 ± 0.0029 | 0.0014 ± 0.0021 | 0.0015 ± 0.0045 |
| <i>Atopobium</i>                   | 0.0006 ± 0.0009 | 0.0008 ± 0.0012 | 0.0004 ± 0.0007 | 0               |
| <i>Phocaeicola</i>                 | 0.0006 ± 0.0014 | 0.0009 ± 0.0013 | 0.0010 ± 0.0018 | 0.0032 ± 0.0053 |
| <i>Solobacterium</i>               | 0.0004 ± 0.0010 | 0.0007 ± 0.0018 | 0               | 0.0002 ± 0.0003 |
| <i>Odoribacter</i>                 | 0               | 0.0061 ± 0.0192 | 0.0025 ± 0.0052 | 0               |

|                                                                                                     |                 |                 |                 |                 |
|-----------------------------------------------------------------------------------------------------|-----------------|-----------------|-----------------|-----------------|
| <i>Brachy bacterium</i>                                                                             | 0.0001 ± 0.0002 | 0               | 0.0017 ± 0.0050 | 0               |
| <i>Clostridiales Fam xi IS</i>                                                                      | 0.0006 ± 0.0019 | 0.0023 ± 0.0050 | 0.0037 ± 0.0067 | 0.0002 ± 0.0005 |
| <i>Rhizobiales</i>                                                                                  | 0.0001 ± 0.0002 | 0.0001 ± 0.0002 | 0.0029 ± 0.0088 | 0.0000 ± 0.0000 |
| <i>Enhydro bacter</i>                                                                               | 0.0001 ± 0.0002 | 0.0001 ± 0.0002 | 0               | 0.0002 ± 0.0003 |
| <i>Neisseriaceae</i>                                                                                | 0.0002 ± 0.0004 | 0.0001 ± 0.0002 | 0.0003 ± 0.0005 | 0.0001 ± 0.0002 |
| Others                                                                                              | 0.0062 ± 0.0049 | 0.0043 ± 0.0050 | 0.0171 ± 0.0152 | 0.0050 ± 0.0056 |
| BMR, below median responders; AMR, above median responders. Values are means ± standard deviations. |                 |                 |                 |                 |
